# Supplementary material
Source: PubMed Central journal article supplement (PMC4118492)

Supplemental Figure 1.

A

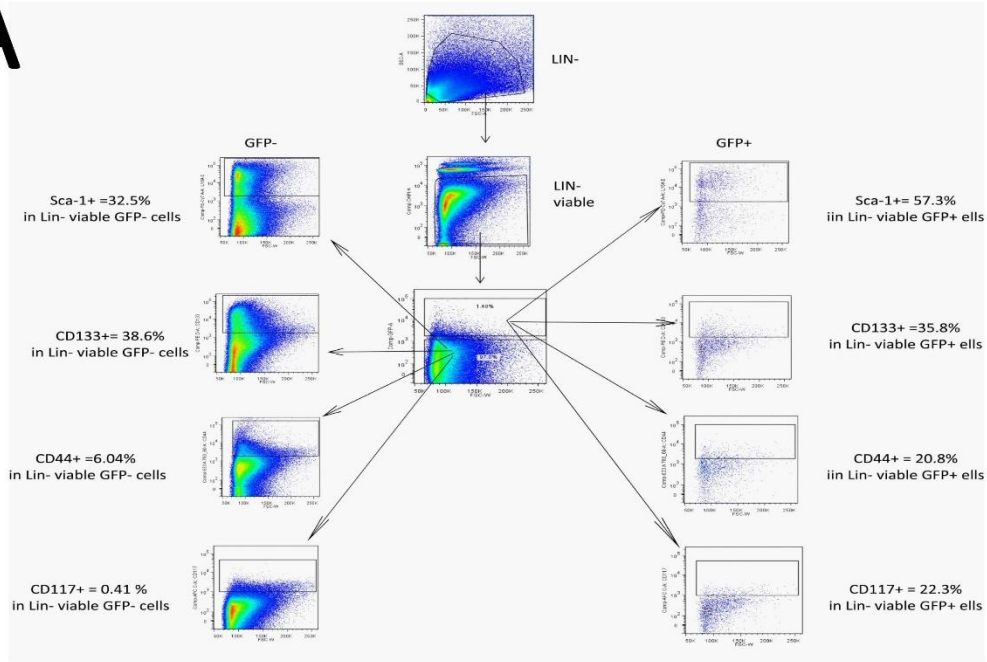

B

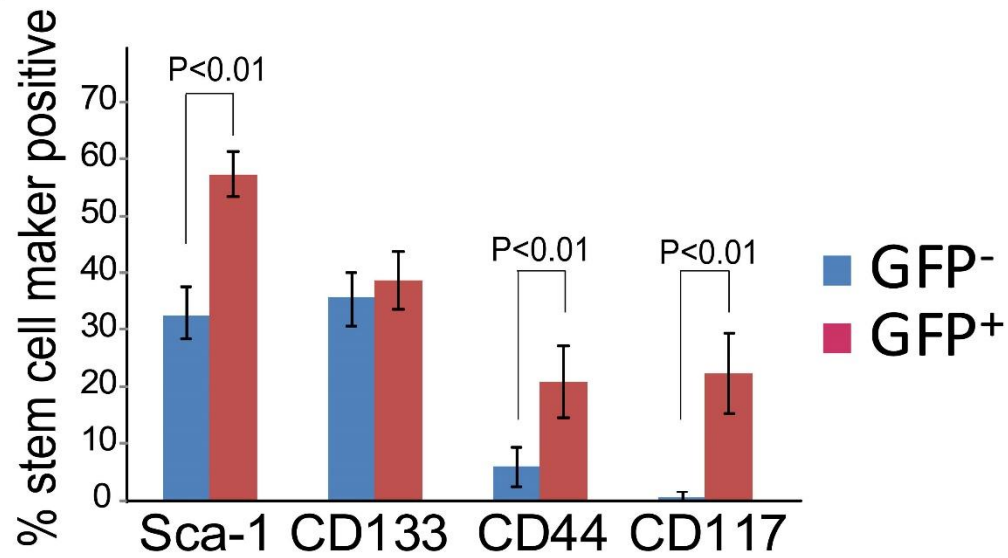

Supplemental Figure 2.

**A** renal capsule graft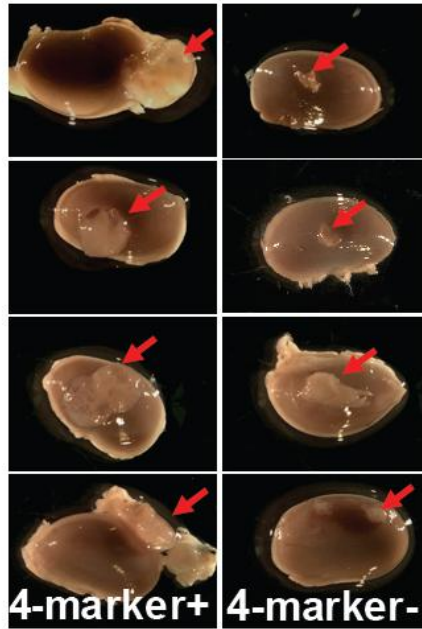**B** weight of renal graft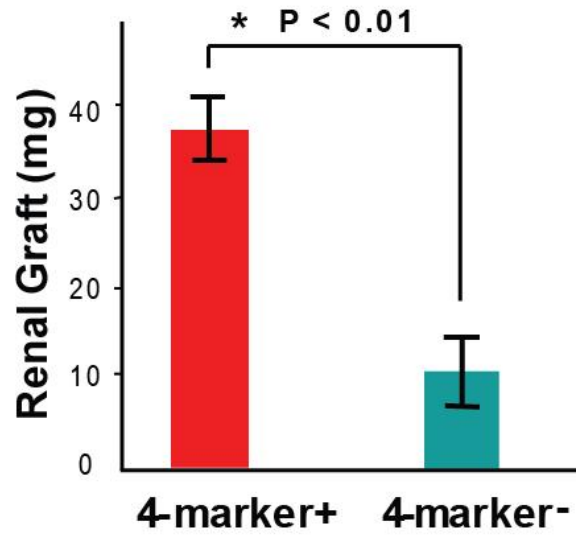**C**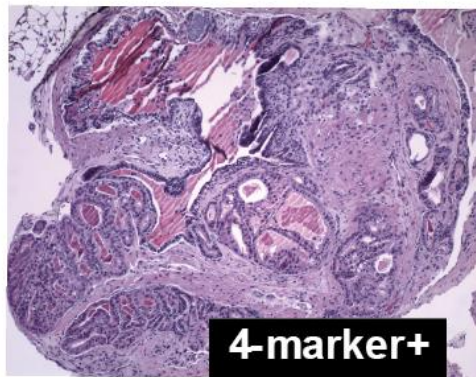**D**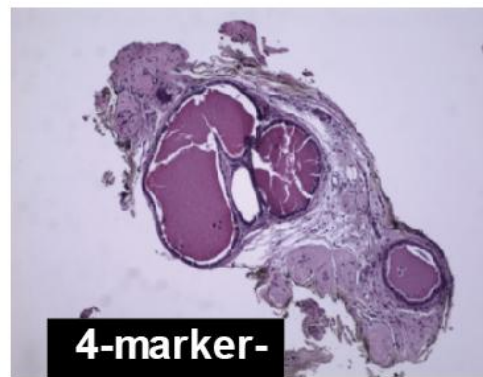

Supplement: NIHMS603417-supplement-01.pdf [file NIHMS603417-supplement-01.pdf]
